# Supplementary material for: Reduced Toxicity of Trichothecenes, Isotrichodermol, and Deoxynivalenol, by Transgenic Expression of the Tri101 3-O-Acetyltransferase Gene in Cultured Mammalian FM3A Cells
Source: MDPI journal article supplement (doi:10.3390/toxins11110654), 2019-11-10
Supplement: s1 [file s1]

# Supplementary Materials: Reduced Toxicity of Trichothecene by Transgenic Expression of *Tri101* 3-*O*-acetyltransferase Gene in Cultured Mammalian Cells

Nozomu Tanaka, Ryo Takushima, Akira Tanaka, Ayaki Okada, Kosuke Matsui, Kazuyuki Maeda, Shunichi Aikawa, Makoto Kimura and Naoko Takahashi-Ando

**Table S1.** The rate of deacetylation of 3-ADON and ITD after 48 h incubation under various conditions.

|            | H <sub>2</sub> O | 125 mM Tris-HCl buffer<br>(pH 6.5) | RPMI1640<br>medium | N-medium<br>(non-boiled<br>FBS) | B-medium<br>(boiled<br>FBS) | FM3A cell culture<br>in B-medium<br>(1 × 10 <sup>5</sup> /ml) | FM3A cell culture<br>in B-medium<br>(6 × 10 <sup>5</sup> /ml) |
|------------|------------------|------------------------------------|--------------------|---------------------------------|-----------------------------|---------------------------------------------------------------|---------------------------------------------------------------|
| 3-ADON→DON | 0.0%             | 1.7%                               | 2.5%               | 4.6%                            | 2.9%                        | 4.9%                                                          | 10.3%                                                         |
| ITD→ITDoI  | 0.0%             | 2.1%                               | 2.9%               | 96.4%                           | 4.6%                        | 17.0%                                                         | 39.1%                                                         |

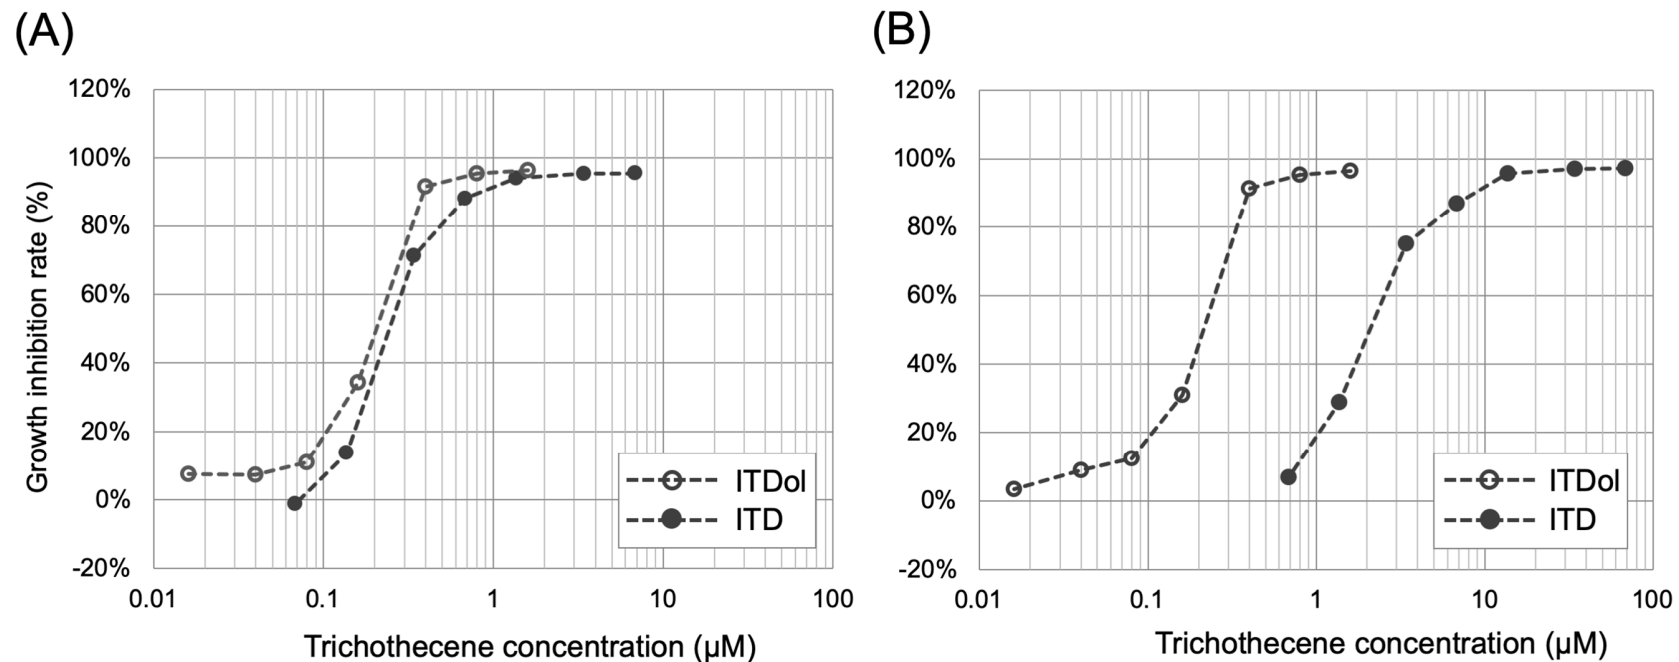

**Figure S1.** The dose-response cytotoxicity curves of trichothecenes. Cytotoxicity assay of ITDol and ITD on FM3A WT cells was carried out using CCK-8 reagent in 96-well plates. Cells were incubated **(A)** in N-medium and **(B)** in B-medium. Each trichothecene was prepared in 50% DMSO, and 1  $\mu$ l of a toxin was added to 99  $\mu$ l of cell culture. After 2-day incubation in a CO<sub>2</sub> incubator, 10  $\mu$ l of CCK-8 reagent was added to each well and incubated at 37 °C for 3 h and OD<sub>450</sub> of the solution in each well was measured using Multiskan™ FC plate reader. Growth inhibition (%) was calculated as  $100 \times \{(\text{OD}_{450} \text{ of vehicle control} - \text{OD}_{450} \text{ of background}) - (\text{OD}_{450} \text{ of trichothecene added} - \text{OD}_{450} \text{ of background})\} / (\text{OD}_{450} \text{ of vehicle control} - \text{OD}_{450} \text{ of background})$ .

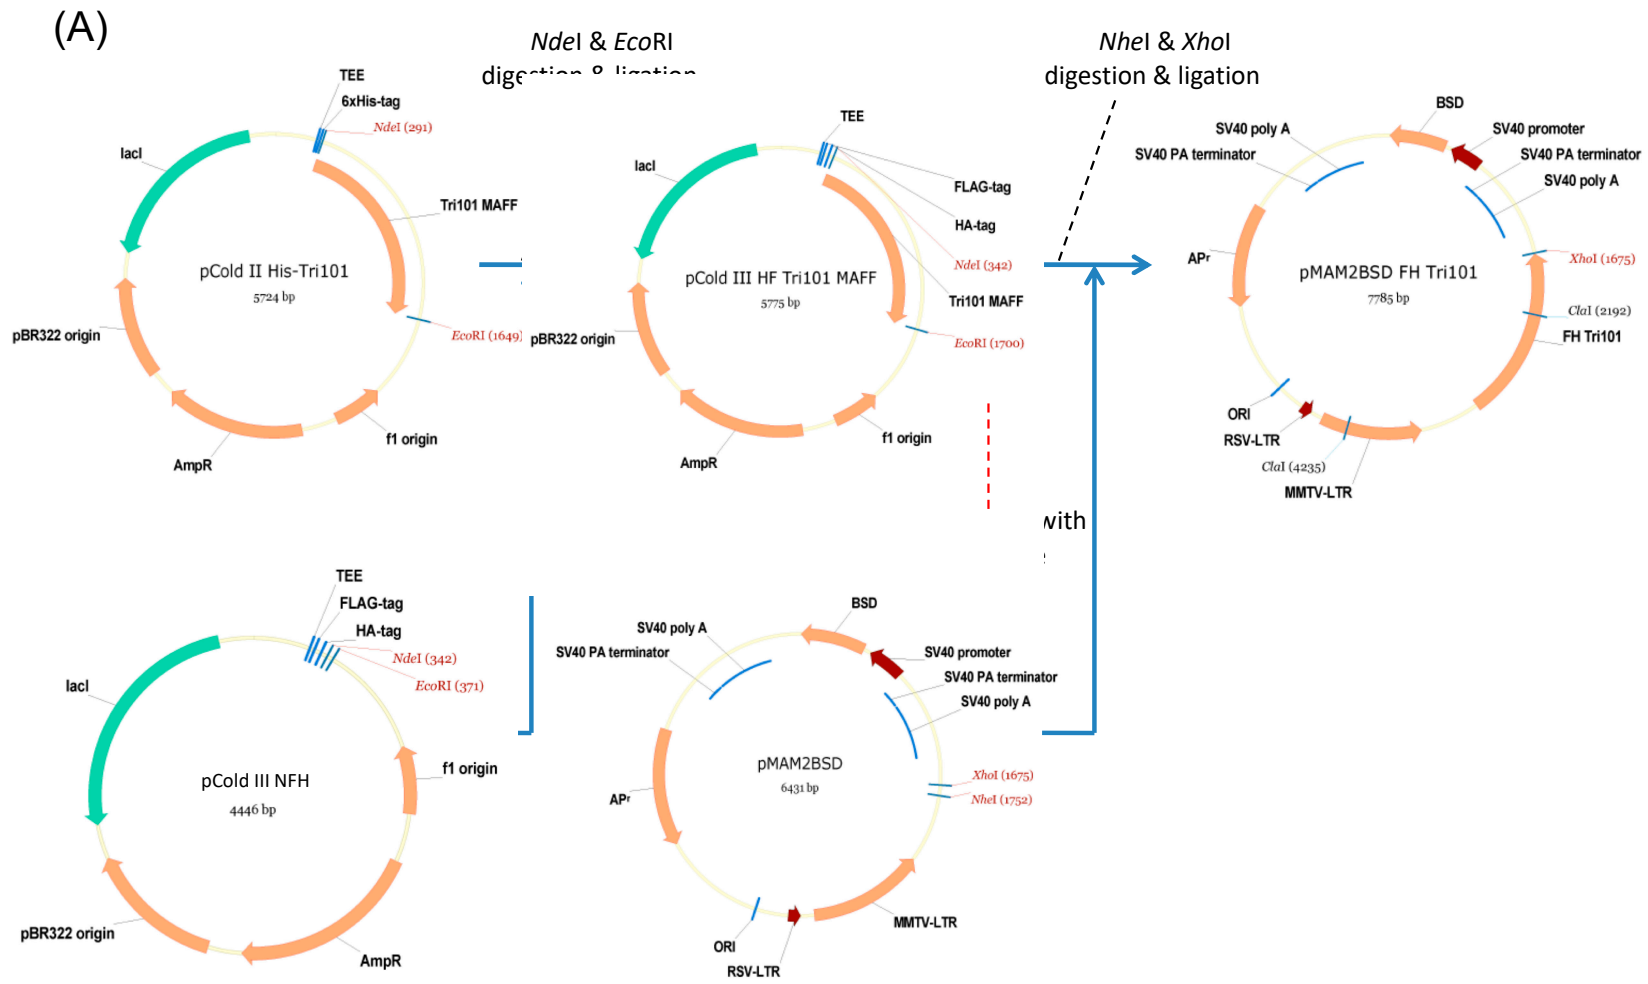

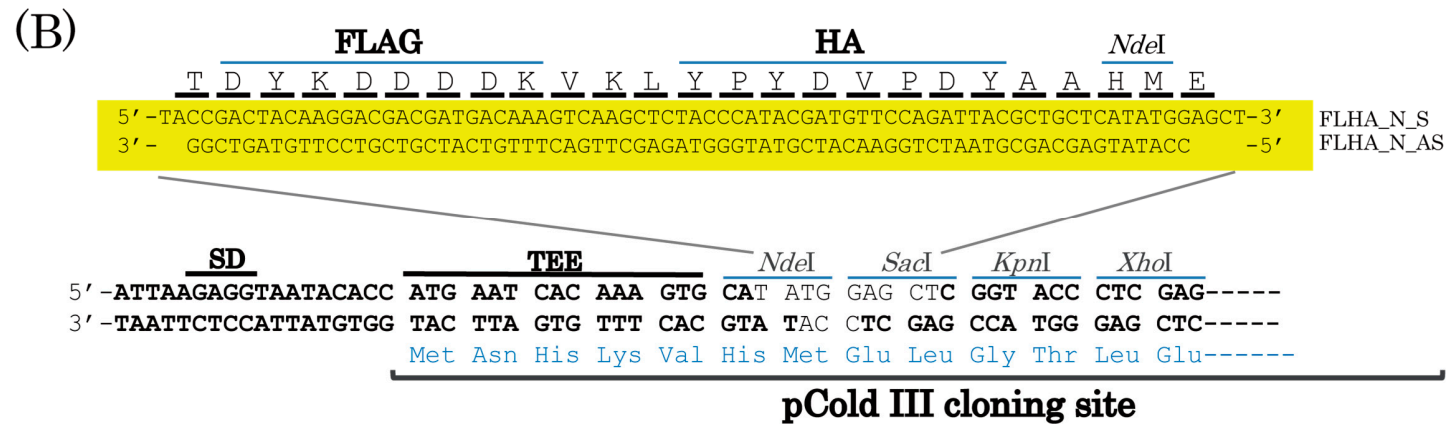

**Figure S2.** Construction of pMAM2BSD\_FH\_Tri101. (A) The plasmid pMAMBSD\_FH\_Tri101 was constructed as described in Materials and Methods. (B) The plasmid pColdIII-NFH was constructed via the insertion of synthetic oligonucleotides (highlighted in yellow) between *NdeI* and *SacI* sites of pCold™III vector (Takara Bio Inc. Shiga, Japan).
